# Supplementary material for: Synthetic methodology effect on the microstructure and thermal properties of poly(n-butyl acrylate-co-methyl methacrylate) synthesized by nitroxide mediated polymerization
Source: Royal Society of Chemistry journal article supplement (doi:10.1039/c1py00066g), 2011-01-01
Supplement: c1py00066g.pdf [file c1py00066g.pdf]

## **Electronic supplementary information**

### **Synthetic methodology effect on the microstructure and thermal properties of poly (*n*-Butyl Acrylate - *co* - Methyl MethAcrylate) synthesized by nitroxide mediated polymerization**

**Nabila Cherifi,<sup>a, b, c</sup> Adeline. Issoulie,<sup>c</sup> Abdel Khoukh,<sup>c</sup> Ahmed. Benaboura,<sup>b</sup> Maud Save,<sup>c</sup>  
Christophe Derail,<sup>c</sup> Laurent. Billon,<sup>\*c</sup>**

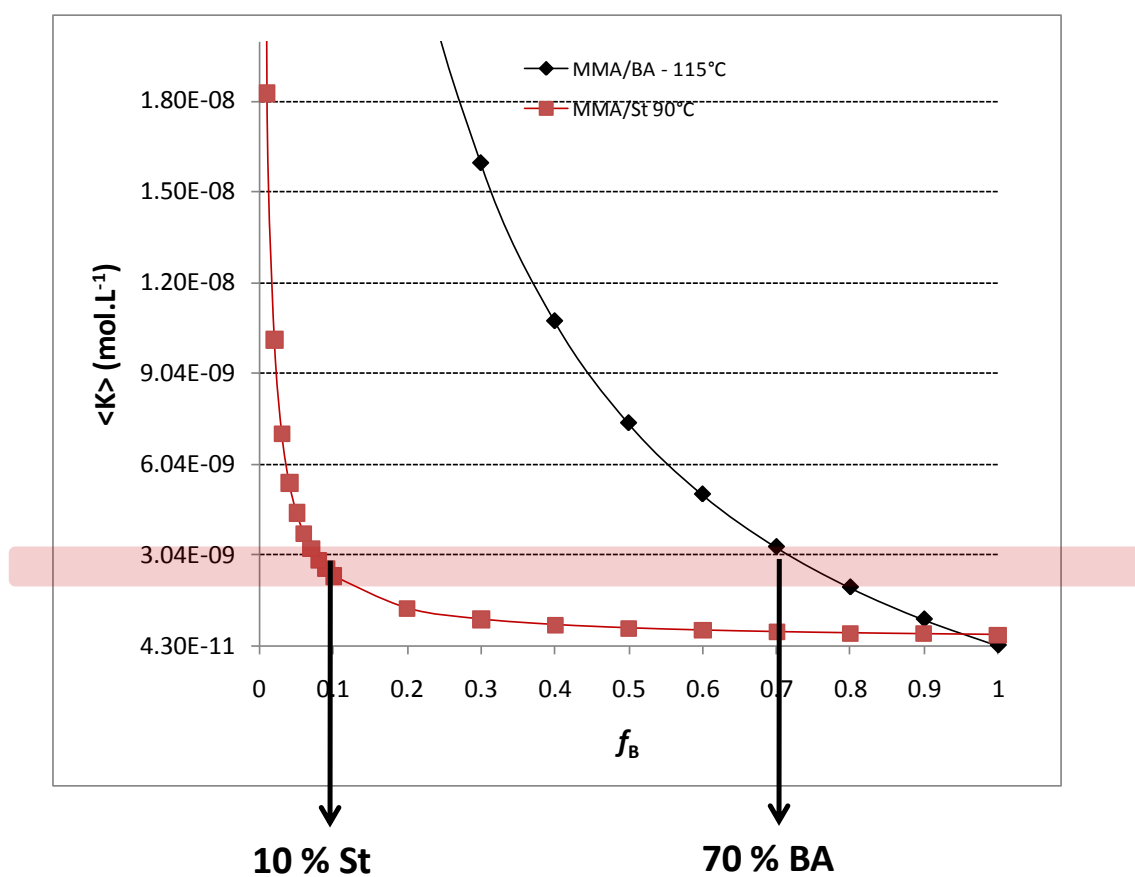

**Figure SI-1.** Theoretical average activation-deactivation equilibrium constant  $\langle K \rangle$  for the copolymerization of methyl methacrylate (MMA) with either styrene (St, red plots) at 90°C or with n-butyl acrylate (BA, black plots) at 115°C as a function of the molar fraction of the comonomer in the monomer mixture.  $\langle K \rangle$  was calculated from the following equation (reference

<sup>1</sup>):

$$\langle K \rangle = \frac{\frac{r_A f_A}{k_{p,A}} + \frac{r_B f_B}{k_{p,B}}}{\frac{r_A f_A}{k_{p,A} K_A} + \frac{r_B f_B}{k_{p,B} K_B}}$$

With A corresponding to MMA and B to either styrene or n-butyl acrylate. The numerical values used to calculate  $\langle K \rangle$  are reported in reference 1 for MMA/St copolymerization and in the notes of the present article.

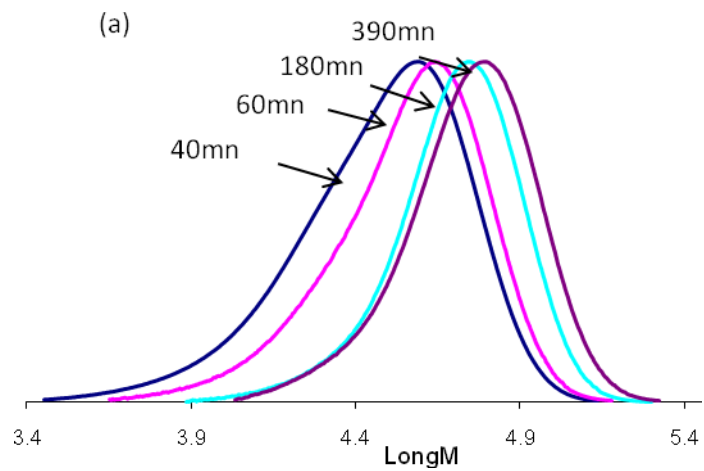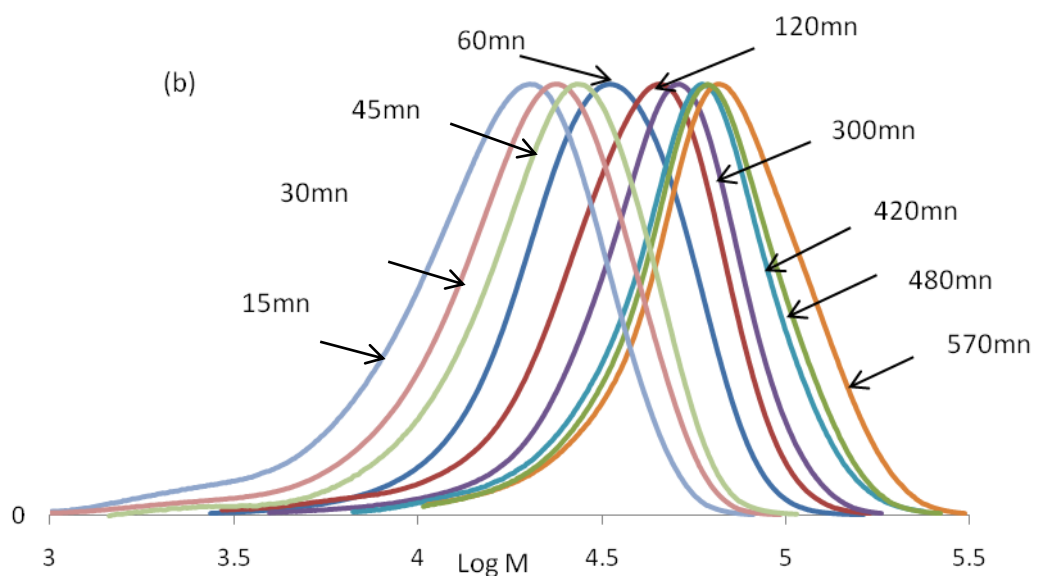

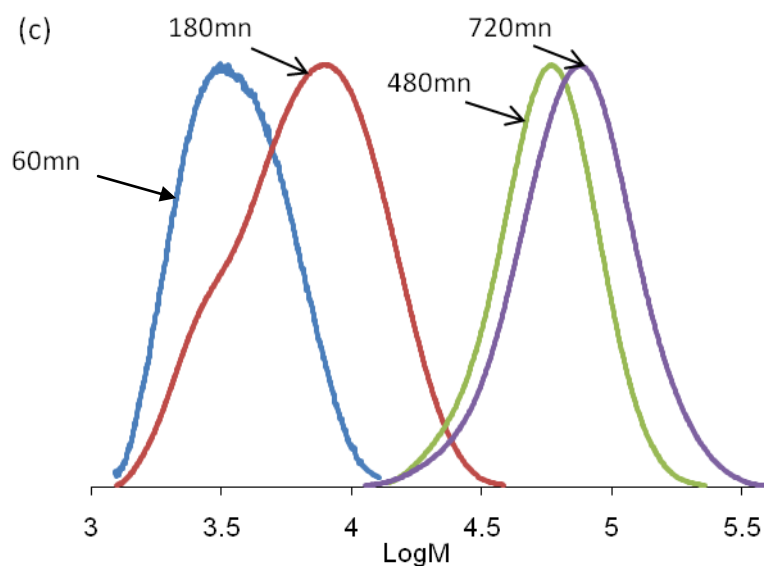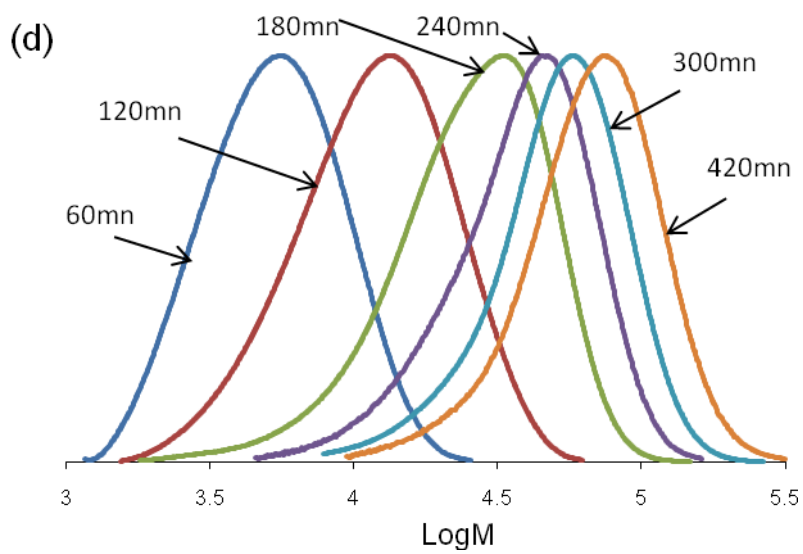

**Figure SI-2.** SEC traces of the copolymers versus time (a) G-Batch, (b) Batch75/25, (c) Semibatch-2.2 and (d) Semibatch-4.3

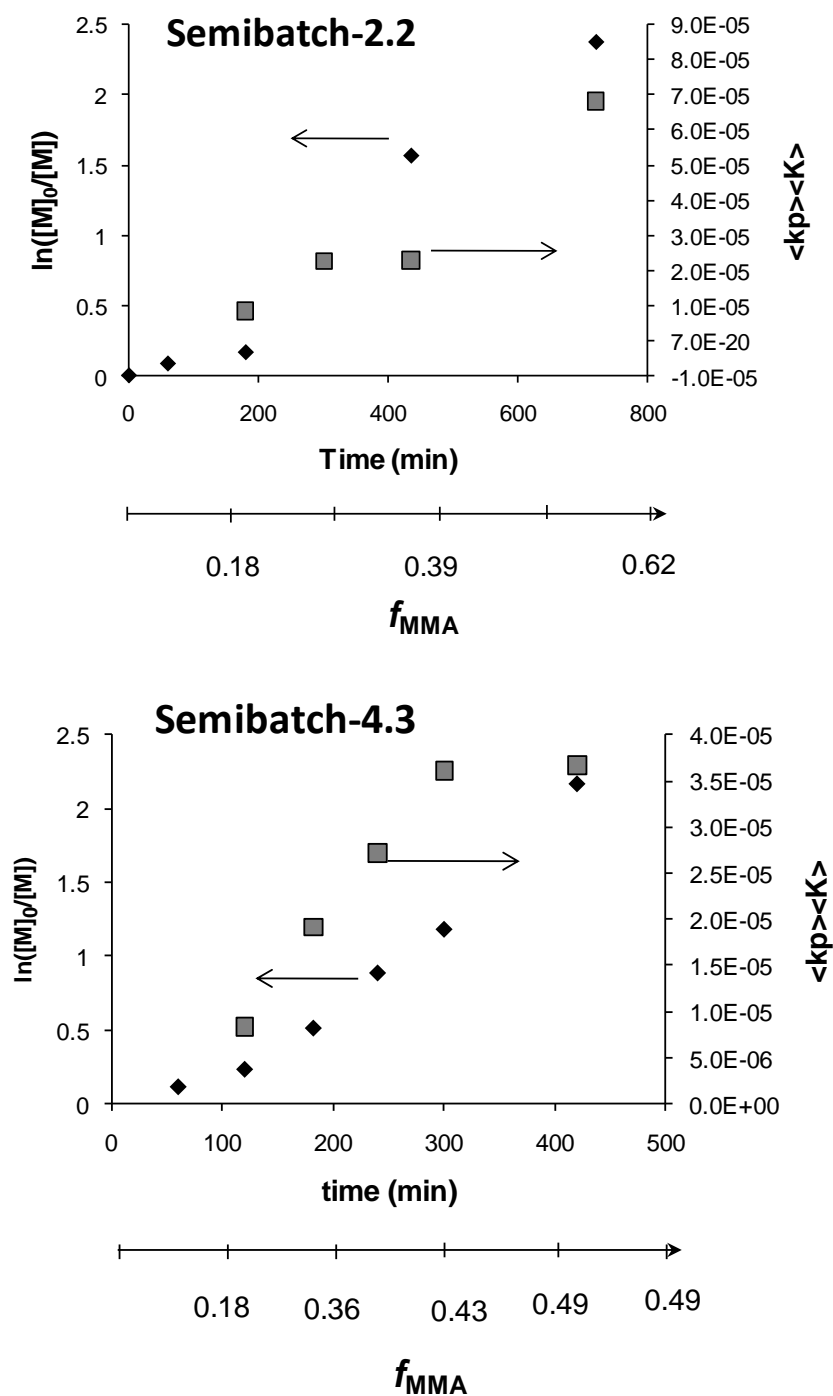

**Figure SI-3** Evolution of  $\ln([M]_0/[M])$  versus time (black diamond symbols) and corresponding variation of the values of the theoretical product of the average activation-deactivation equilibrium constant with the average propagation rate constant  $\langle k_p \rangle \langle K \rangle$  (grey square symbols) as a function of time. For each sample, the corresponding molar fraction of methyl methacrylate in the comonomer mixture is plotted in a second x axis. Semi-batch copolymerizations of n-butyl acrylate and methyl methacrylate at 115°C (Semibatch-2.2 and Semibatch-4.3).

The  $\ln [M]_0 / [M]$  versus time was calculated by consideration of the overall number of moles of BA and MMA at each time of the polymerization. So in the calculation of  $M_0$ , we consider at each time, the sum of the initial BA amount (0.192 mol) and the overall amount of

MMA introduced during the reaction and which continuously changes. For a MMA addition rate of 4.3 ml / h, this quantity is 4.3 ml after 60min, 8.6 ml after 120min and so on ...

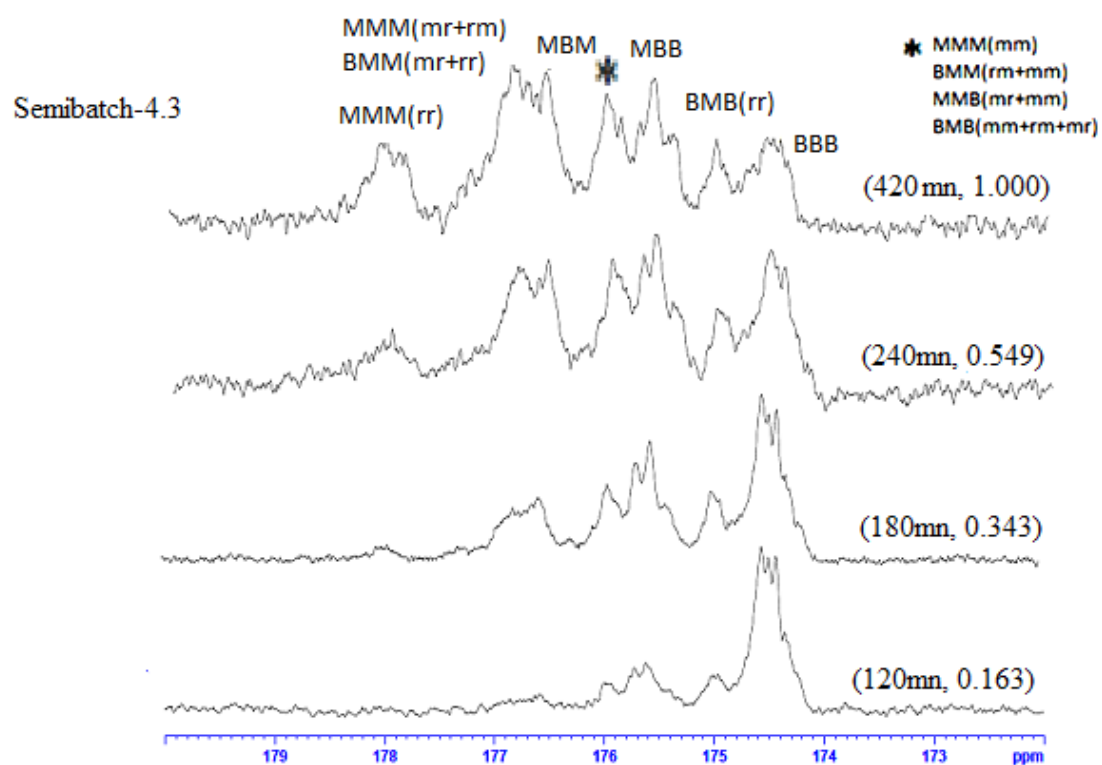

**Figure SI-4.**  $^{13}\text{C}$  NMR spectra showing the carbonyl region of Semibatch-4.3 copolymers as function of time and apparent normalized chain length

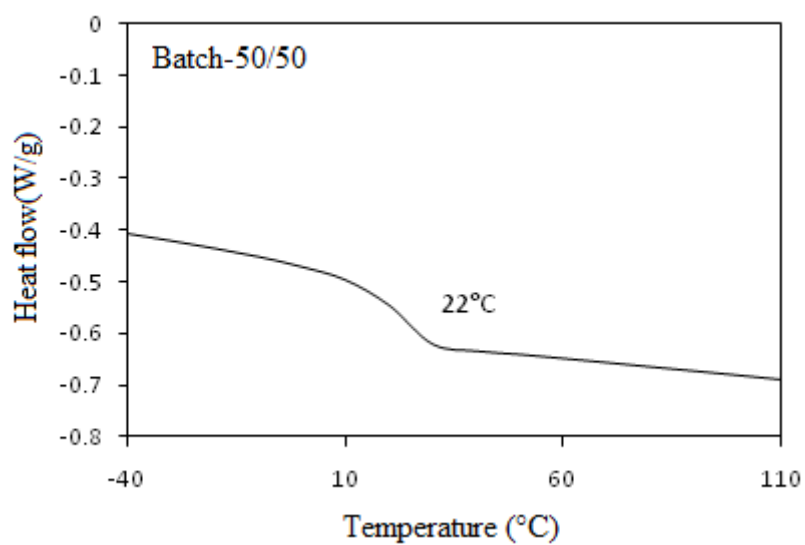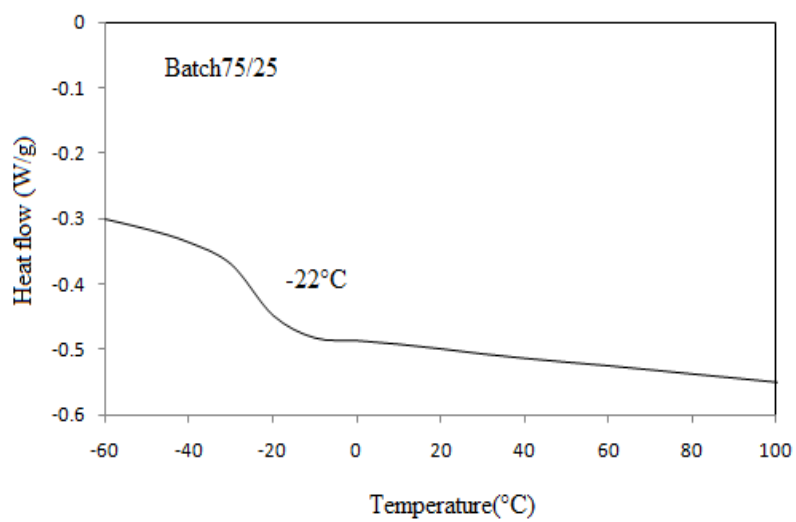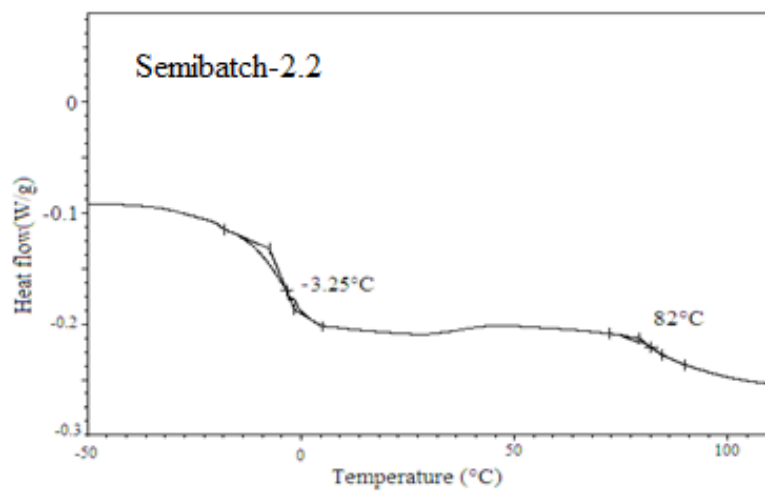



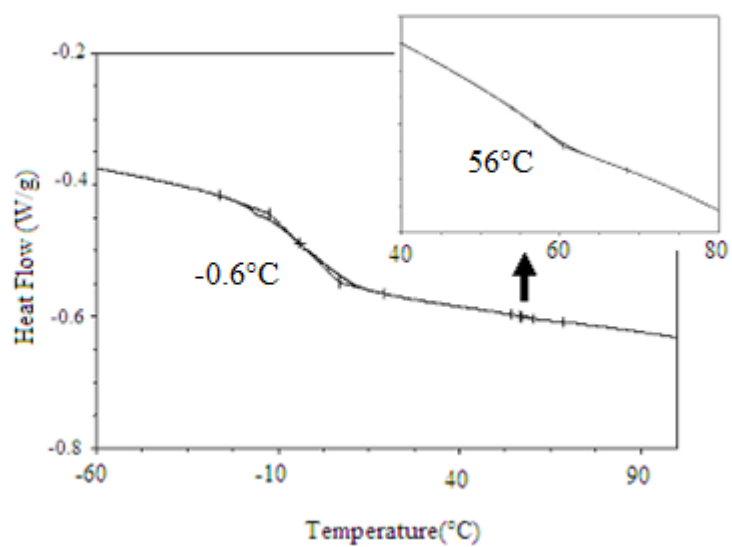

**Figure SI-5.** DSC heating curves for Batch50/50, batch75/25, Semibatch-2.2 and Smibatch-4.3

---

<sup>1</sup> B. Charleux, J. Nicolas, O. Guerret, *Macromolecules* 2005, **38**, 5485.
